# Supplementary material for: Uranyl–halide complexation in N,N-dimethylformamide: halide coordination trend manifests hardness of [UO2]2+
Source: Royal Society of Chemistry journal article supplement (doi:10.1039/c3dt51191j), 2013-01-01

## **Electronic Supplementary Information**

### **Uranyl-Halide Complexation in *N,N*-Dimethylformamide: Halide Coordination Trend Manifests Hardness of $\text{UO}_2^{2+}$**

Koichiro Takao,<sup>\*a,b</sup> Shinobu Takao,<sup>b,c</sup> Yasuhisa Ikeda,<sup>a</sup> Gert Bernhard,<sup>b</sup>  
Christoph Hennig<sup>\*b</sup>

<sup>a</sup>Research Laboratory for Nuclear Reactors, Tokyo Institute of Technology, 2-12-1, O-okayama, Meguro-ku, 152-8550 Tokyo, Japan.

<sup>b</sup>Institute of Resource Ecology, Helmholtz Zentrum Dresden-Rossendorf, P.O.Box 51 01 19, 01314 Dresden, Germany.

<sup>c</sup>Innovation Research Center for Fuel Cells, The University of Electro-Communications, 1-5-1, Chofugaoka, Chofu-shi, 182-8585 Tokyo, Japan.

\*To whom correspondence should be addressed. E-mail: ktakao@nr.titech.ac.jp (K.T.),  
hennig@esrf.fr (C.H.).

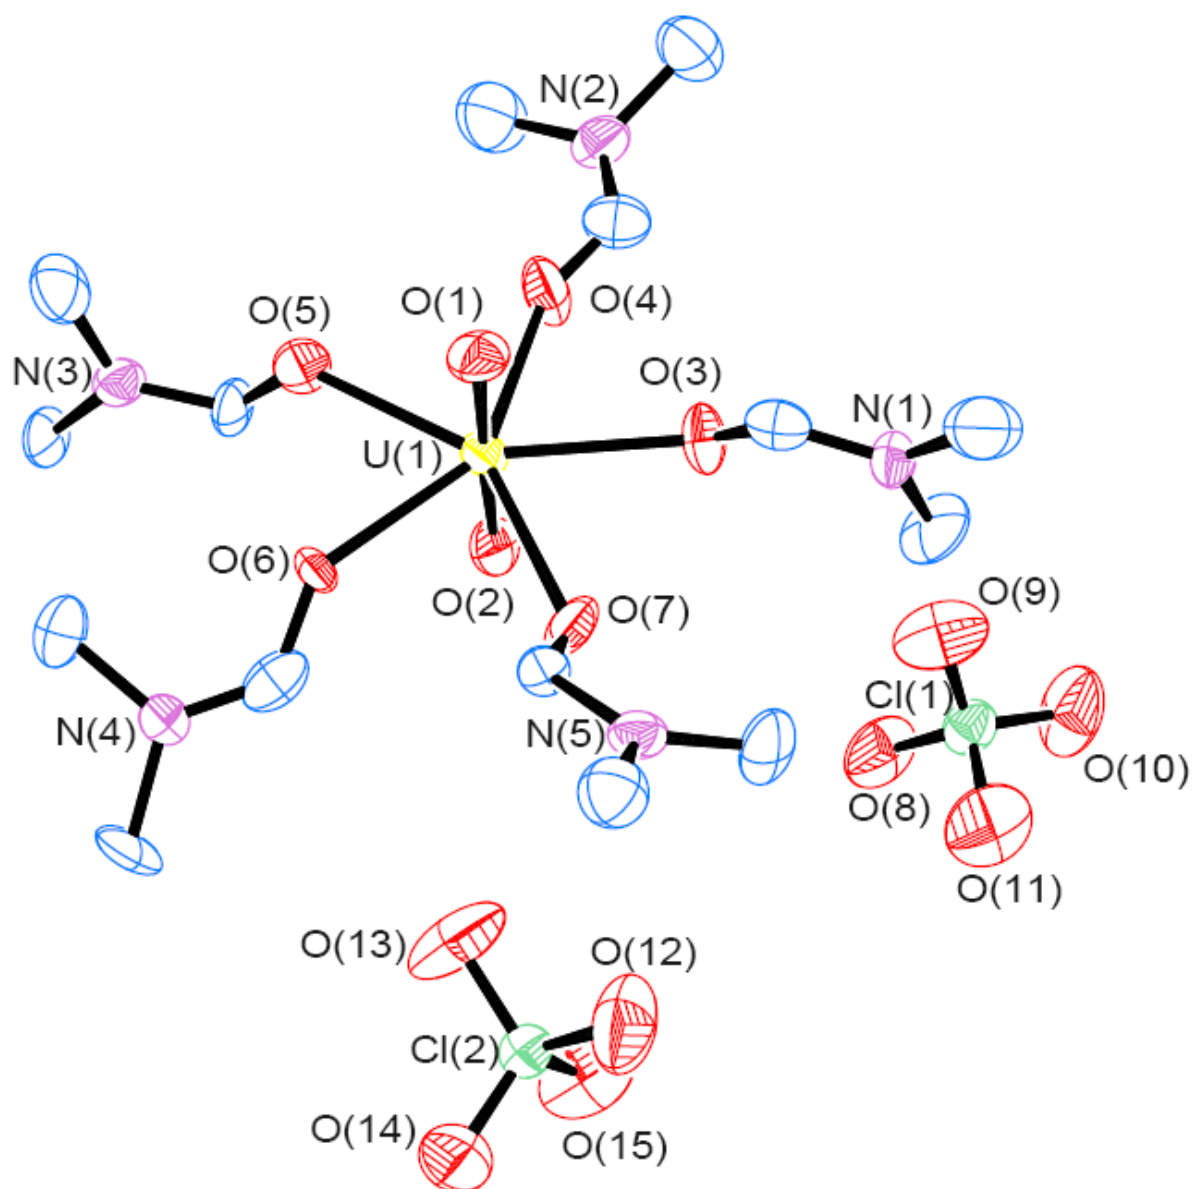

**Fig. S1.** ORTEP drawing of  $[\text{UO}_2(\text{DMF})_5](\text{ClO}_4)_2$  showing 50% probability displacement ellipsoids. All hydrogen atoms are omitted for clarity. Selected bond lengths [ $\text{\AA}$ ] and angles [ $^\circ$ ]: U(1)-O(1) 1.79(2), U(1)-O(2) 1.76(2), U(1)-O(3) 2.414(11), U(1)-O(4) 2.338(7), U(1)-O(5) 2.377(12), U(1)-O(6) 2.332(11), U(1)-O(7) 2.465(14), O(1)-U(1)-O(2) 177.8(7), O(1)-U(1)-O(3) 89.4(6), O(1)-U(1)-O(4) 90.3(8), O(1)-U(1)-O(5) 90.4(6), O(1)-U(1)-O(6) 90.6(6), O(1)-U(1)-O(7) 89.8(6), O(3)-U(1)-O(4) 69.3(6), O(4)-U(1)-O(5) 75.6(6), O(5)-U(1)-O(6) 71.0(4), O(6)-U(1)-O(7) 73.1(4), O(3)-U(1)-O(7) 70.9(5).

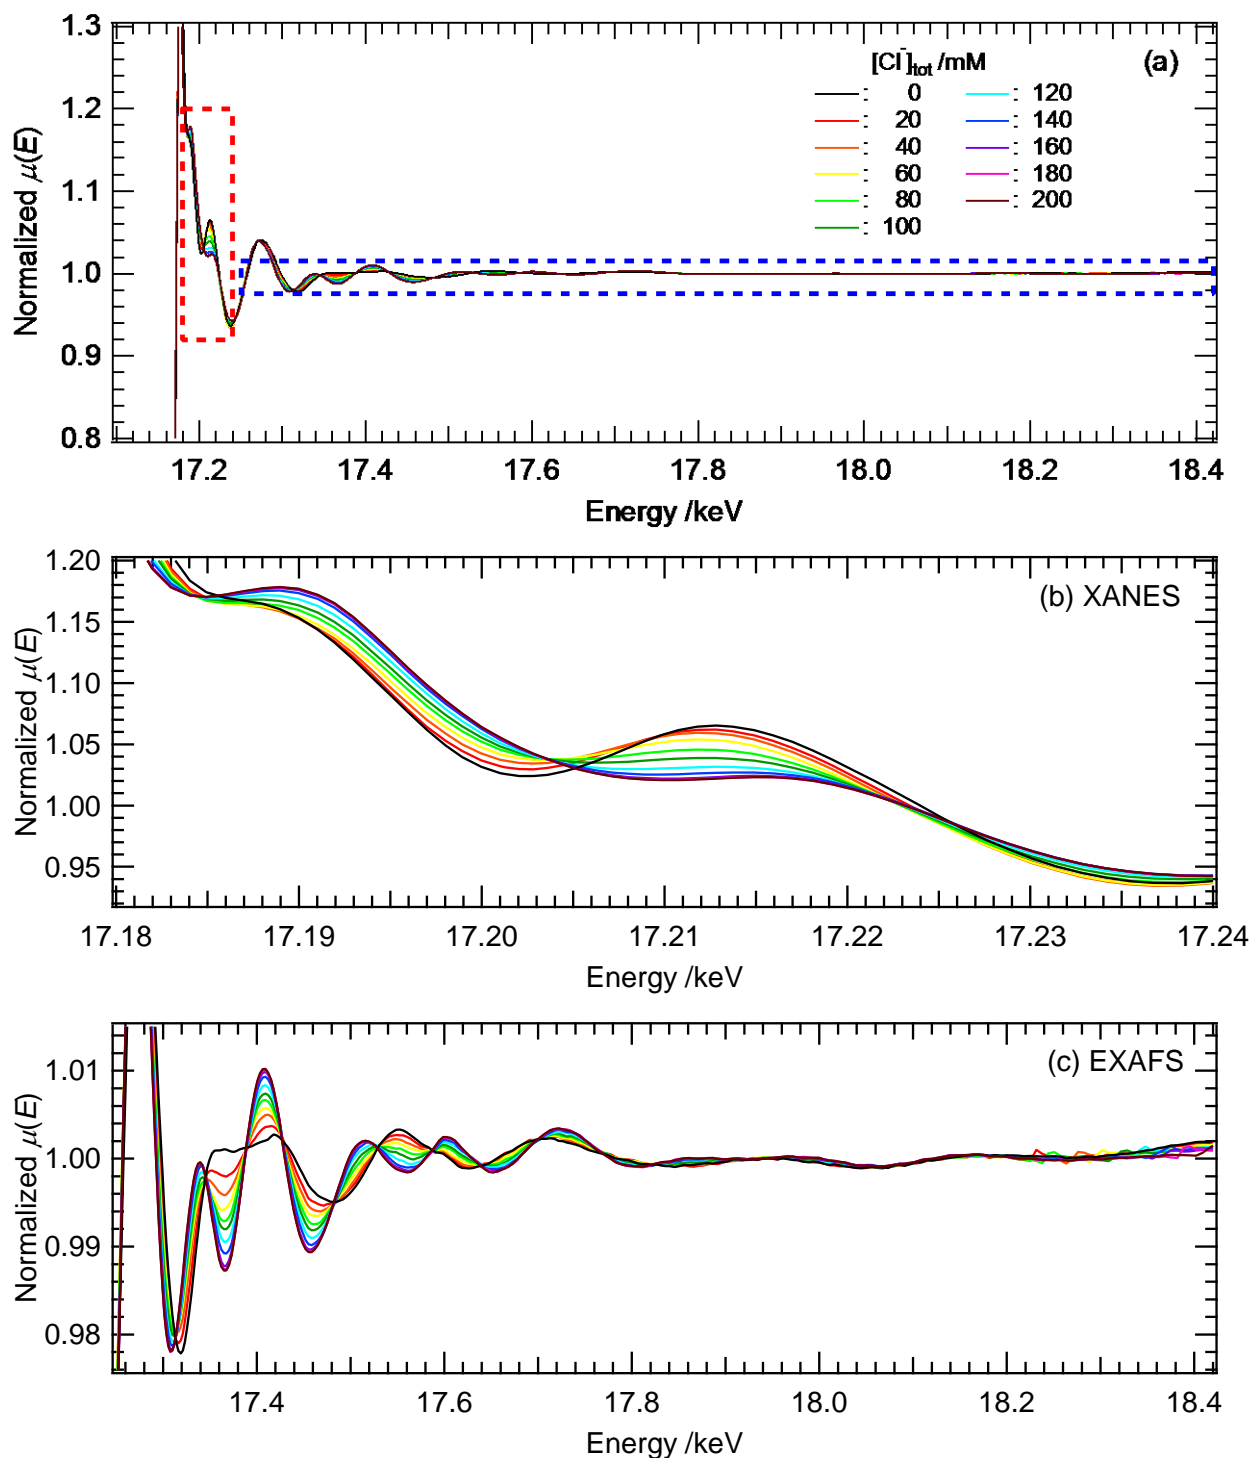

**Fig. S2.** Normalized X-ray absorption spectra of DMF solution dissolving  $[UO_2(DMF)_5](ClO_4)_2$  ( $4.0 \times 10^{-2}$  M) and  $[TBA]Cl$  ( $0-2.0 \times 10^{-1}$  M) at 295 K. Panels b and c are magnified pictures of the regions surrounded by dashed rectangles in red and blue, respectively.

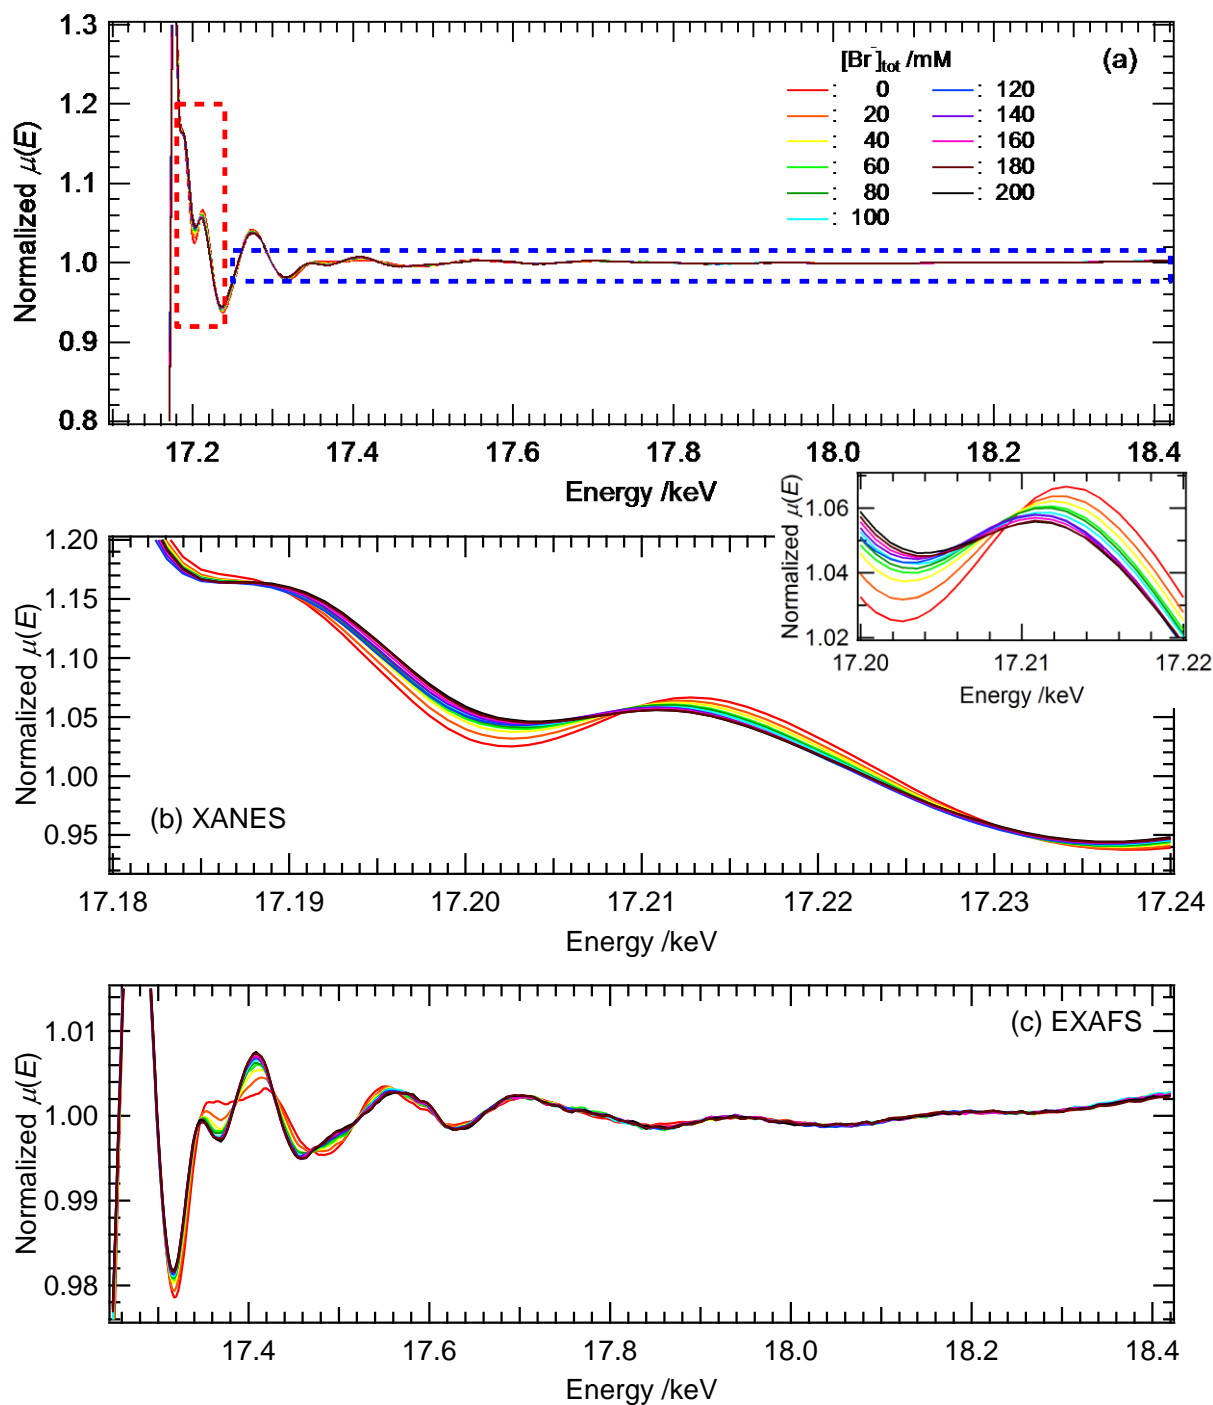

**Fig. S3.** Normalized X-ray absorption spectra of DMF solution dissolving  $[\text{UO}_2(\text{DMF})_5](\text{ClO}_4)_2$  ( $4.0 \times 10^{-2}$  M) and  $[\text{TBA}]\text{Br}$  ( $0\text{-}2.0 \times 10^{-1}$  M) at 295 K. Panels b and c are magnified pictures of the regions surrounded by dashed rectangles in red and blue, respectively. Inset in panel b is a further magnification of 17.20-17.22 keV region.

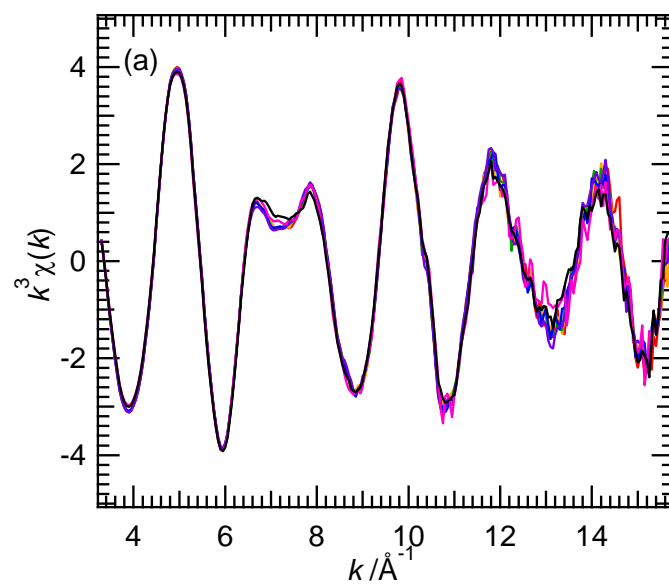

**Fig. S4.**  $k^3$ -weighted U  $L_{III}$ -edge EXAFS spectra of DMF solution dissolving  $[\text{UO}_2(\text{DMF})_5](\text{ClO}_4)_2$  ( $4.0 \times 10^{-2}$  M) and  $[\text{TBA}]\text{I}$  ( $0$ - $2.0 \times 10^{-1}$  M) at 295 K.

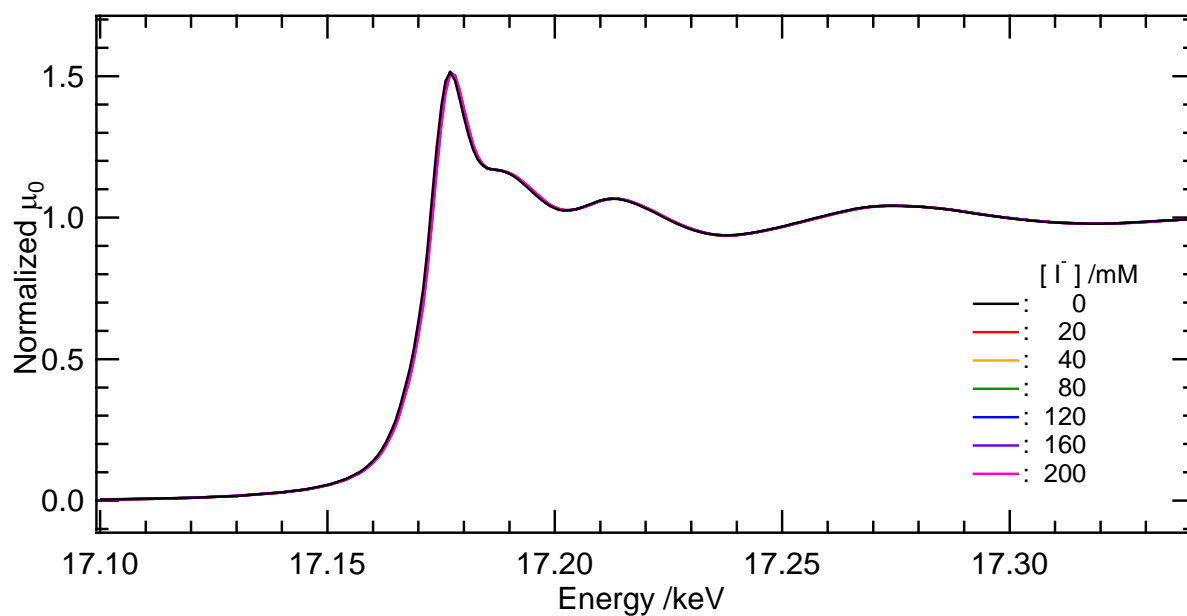

**Fig. S5.** U  $L_{III}$ -edge XANES spectra of DMF solution dissolving  $[\text{UO}_2(\text{DMF})_5](\text{ClO}_4)_2$  ( $4.0 \times 10^{-2}$  M) and  $[\text{TBA}]\text{I}$  ( $0$ - $2.0 \times 10^{-1}$  M) at 295 K.

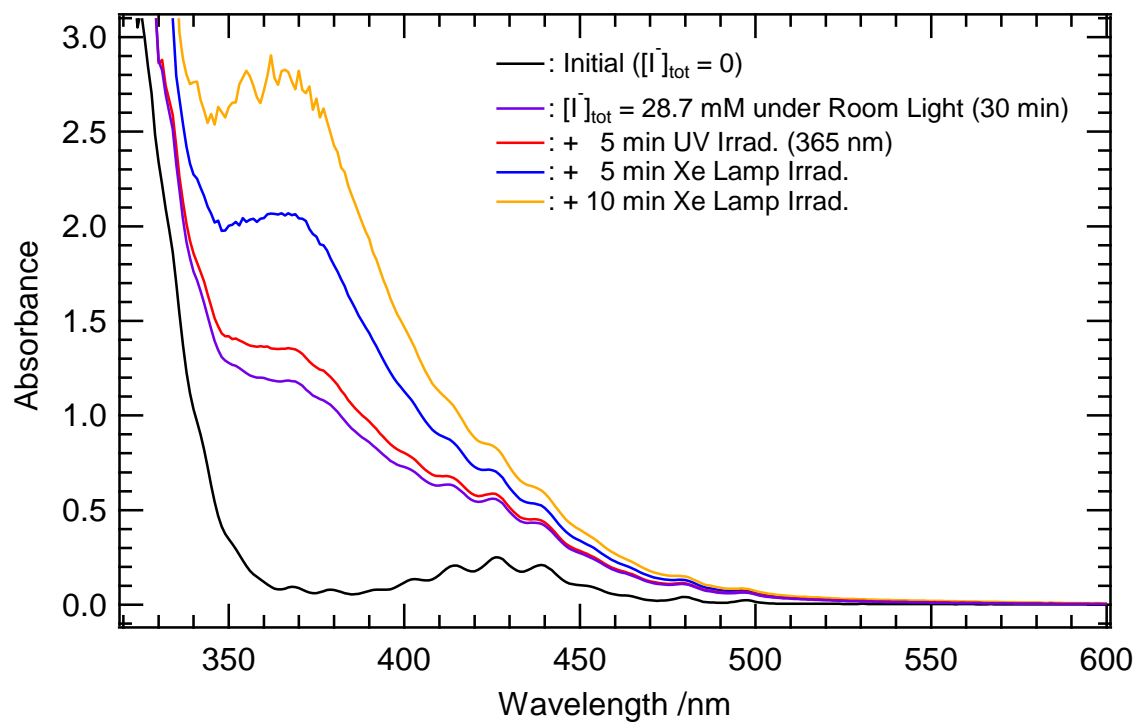

**Fig. S6.** UV-vis absorption spectra of the photo-irradiated DMF solution dissolving  $[UO_2(DMF)_5](ClO_4)_2$  ( $6.64 \times 10^{-3}$  M) at different total  $I^-$  concentrations ( $[I^-]_{tot}$ ) and 295 K.

**Table S1.** Cone Angles ( $\theta$ ) of Coordinating  $\text{Cl}^-$  and  $\text{Br}^-$

| ion           | $r_{\text{vdw}} / \text{\AA}^a$ | $R(\text{U-X}) / \text{\AA}^b$ | $\theta / ^\circ$ |
|---------------|---------------------------------|--------------------------------|-------------------|
| $\text{Cl}^-$ | 2.252                           | 2.68-2.71                      | 112-114           |
| $\text{Br}^-$ | 2.298                           | 2.88-2.89                      | 105-106           |

<sup>a</sup>Van der Waals radius brought from *J. Am. Chem. Soc.* 1964, **86**, 979-982. <sup>b</sup>Interatomic distance from U to X (=  $\text{Cl}^-$ ,  $\text{Br}^-$ ) determined from EXAFS (Tables 3, 4).

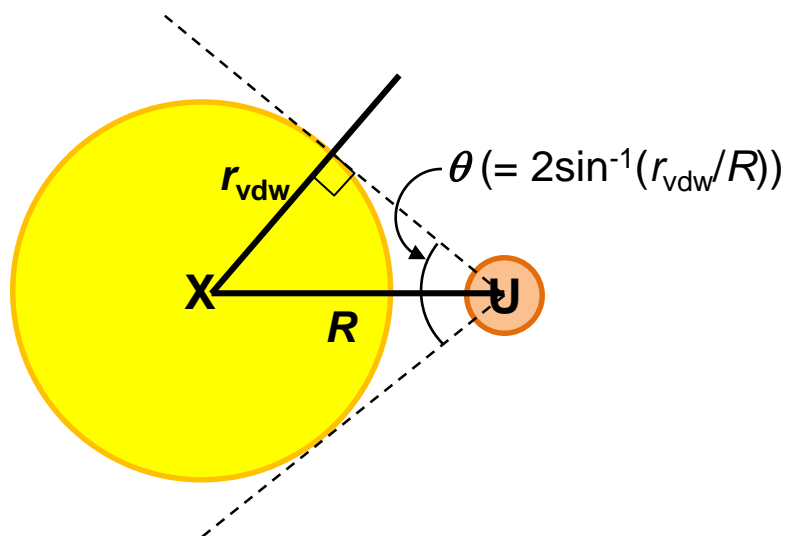

Supplement: c3dt51191j.pdf [file c3dt51191j.pdf]
